# Supplementary material
Source: PubMed Central journal article supplement (PMC5665117)
Supplement: 149_Appendix.pdf [file 149_Appendix.pdf]

## CSES Youth Specialization Score

Name: \_\_\_\_\_

Age: \_\_\_\_\_

Today's Date: \_\_\_\_ / \_\_\_\_ / \_\_\_\_

### PART 1

Please answer EACH of the following questions.

1. Gender:      Male                       Female
2. Main Sport: \_\_\_\_\_
3. Other Sports: \_\_\_\_\_
4. At what age did you start to focus on your main sport? \_\_\_\_\_ OR  I don't focus on a single sport
5. At what age did you start playing this sport? \_\_\_\_\_
6. Which statement best describes you?
  - I focus on one sport only
  - I play multiple sports but have a favorite
  - I like the sports I play equally
7. Have you ever been injured playing your sport?      Yes                       No
 

What was the injury? \_\_\_\_\_

Did you see a doctor?                       Yes                       No

Did you have surgery?                       Yes                       No

### PART 2

The following questions refer to the sport you play the most:

1. How much fun do you have playing your sport?
  - None                       A little                       Some                       A lot                       Very much
2. How often do you want to quit your sport?
  - Never                       Rarely                       Sometimes                       Often                       Always
3. How often do you wish you could play more or different sports?

Never     Rarely     Sometimes     Often     Always

**4. How often has your coach told you not to play other sports?**

Never     Rarely     Sometimes     Often     Always

**5. How often have your parents told you not to play other sports?**

Never     Rarely     Sometimes     Often     Always

**6. How many of your friends play more sports than you?**

None     A few     Some     Most     All

**7. What is the highest level of play you hope to reach?**

Just for fun     Travel team     School Varsity     College     Professionally

**8. How many months per year do you play your sport?**

0-3     4-6     7-8     9-10     11-12

**9. How many different leagues and clubs do you play your sport in per year?**

0-1     2     3     4     5+

**10. How many hours per week do you spend playing and practicing?**

0-3     4-6     7-9     10-12     13+

**11. How many hours per week of one on one practice do you receive from a coach?**

0-2     3-5     6-8     9-10     11+

**12. How often has your sports stopped you from being a better student?**

Never     Rarely     Sometimes     Often     Always

**13. How often has your sport stopped you from spending more time with your friends?**

Never     Rarely     Sometimes     Often     Always

**14. How important is being good at your sport?**

Not at all     A little     Somewhat     A lot     Extremely

**15. How often do you lift weights?**

Never     1-2x/month     1-2x/week     3-4x/week     5+/week
